# Supplementary material for: A High Density Consensus Map of Rye (Secale cereale L.) Based on DArT Markers
Source: PLoS One. 2011 Dec 6;6(12):e28495. doi: 10.1371/journal.pone.0028495 (PMC3232230; doi:10.1371/journal.pone.0028495)
Supplement: Table S9 — Consensus map of chromosome 6R and orders of shared and unique markers within the 6R integrated map. (XLS) [file pone.0028495.s016.xls]

## Sheet: 6R comsensus map
Legend:
XrPt347901	shared markers
XrPt399564	unique markers
*	markers with distorted segregation (P <0.01)
Group H6R	Cumulative distance	distorted markers (p<0.01)	Group K6R	Cumulative distance	distorted markers (p<0.01)	Group L6R	Cumulative distance	distorted markers (p<0.01)	Group M6R	Cumulative distance	distorted markers (p<0.01)	Group S6R	Cumulative distance	distorted markers (p<0.01)
XrPt346841	0		XrPt120754	0	*	Xscsz980L650	0		Xscsz980L650	0		XrPt401578	0
XrPt400031	5.5		XrPt400398	0.4		XrPt347012	0		XrPt347012	0		XrPt402418	0
XrPt390046	22.3		XrPt401305	35.1		XrPt345433	0		XrPt345433	0		XrPt390046	3.2
XrPt410769	22.6		XrPt506337	37.3	*	XrPt390764	1.5		XrPt390764	0.4		XrPt410769	3.2
XrPt398814	24.7		XrPt402328	40.9		XrPt400291	3		XrPt401305	6		XrPt120754	3.8
XrPt400865	25.3		Xpsr106.1L350	61.5		XrPt506387	3		XrPt507440	7		XrPt343387	3.8
XrPt401445	25.3		XrPt506512	68	*	XrPt400293	3.3	*	XrPt401349	9.2		XrPt400398	3.8
XrPt348489	27.1		XrPt507100	72.4		XrPt401517	3.3	*	XrPt506337	9.7		XrPt402620	5.2
XrPt344921	31		XrPt505168	72.6		XrPt401305	6.6		XrPt401102	12.6		XrPt401305	17.4
XrPt505139	31		XrPt410881	72.6		XrPt506337	6.9		XrPt507629	13.2		XrPt506337	18.6
XrPt400697	31		XrPt509445	73.3		XrPt401102	8	*	XrPt389418	13.6		XrPt400907	18.6
XrPt507634	31		XrPt399365	74.9		XrPt410992	8	*	XrPt507862	14		XrPt401478	18.6	*
XrPt411237	31		XrPt401898	74.9		XrPt401874	9.2	*	XrPt505541	14.5		XrPt399613	18.6	*
XrPt506825	31		XrPt402114	75.3		XrPt402420	9.2	*	XrPt410992	14.5		XrPt505404	18.6	*
XrPt507327	36.8	*	XrPt401117	75.5		XrPt505404	9.2	*	XrPt401874	16.2		XrPt402420	18.6	*
XrPt507383	37.2	*	XrPt507607	84.4		XrPt399613	9.2	*	XrPt400907	16.2		XrPt402328	19.3
XrPt120754	44.9		XrPt344894	84.4		XrPt401478	9.2	*	XrPt402328	16.8		XrPt400431	19.3
XrPt343387	45.3		XrPt389973	84.4		XrPt400907	9.2		XrPt411453	17.6		XrPt507326	19.3	*
XrPt400398	45.9	*	XrPt505351	84.4		XrPt402328	9.8	*	XrPt389693	36.2		XrPt506274	23.2	*
XrPt402620	46.2		XrPt410859	84.4		XrPt389914	10		XrPt509445	38.8	*	XrPt389973	23.2
XrPt507920	51.1	*	XrPt345840	84.6		XrPt400431	11.9		XrPt507429	43.7		XrPt507607	23.2
XrPt401932	51.1		XrPt347871	86.3		Xapr6.1	11.9	*	XrPt507786	43.7		XrPt410859	23.2
XrPt399340	53		XrPt505745	86.3		XrPt507326	11.9	*	XrPt505351	43.7		XrPt344894	23.2
XrPt402229	55		XrPt401420	86.5		XrPt506274	18.1	*	XrPt344894	43.7		XrPt505351	23.2
XrPt508125	55		XrPt506313	89.1		XrPt389693	27.1		XrPt410859	43.7		XrPt345840	33.3
XrPt505897	55		XrPt509455	94.3	*	XrPt505804	33.5		XrPt389973	43.7		XrPt399745	33.3
XrPt116344	55		XrPt508289	95.8	*	XrPt506512	36		XrPt507607	43.7		XrPt390428	33.3
XrPt116320	55.3		XrPt402513	104.5		XrPt410881	36.3		XrPt345840	45.1		Xscsz777L600	34.8
XrPt389530	60.4		XrPt401137	104.5		XrPt402243	36.6		XrPt390428	45.3		XrPt410999	45.8
XrPt508711	60.4		XrPt506412	106.1		XrPt401898	36.6		XrPt400253	47.5		XrPt400396	45.8
XrPt389665	60.4		XrPt121347	106.6		XrPt402114	36.6		XrPt400887	47.5		XrPt400126	53.2
XrPt401893	62.1		XrPt506992	107.1		XrPt506177	39.6	*	XrPt398478	50		XrPt506992	54.1
XrPt343885	67.5		XrPt410765	107.1		XrPt508112	41.1		XrPt389411	50		XrPt389306	54.1
XrPt509093	67.9		Xscm176	109.9		XrPt507607	41.1	*	XrPt505745	50		XrPt389738	54.1
XrPt400998	69.4		XrPt116080	112.6		XrPt389973	41.1		XrPt401420	50		XrPt119621	54.1
XrPt411242	69.7		XrPt402510	120.5		XrPt505351	41.1		XrPt347871	50		XrPt402575	54.1
XrPt508019	70.5		XrPt389714	120.5		XrPt410859	41.1		XrPt398714	50.2		XrPt389714	55
XrPt401725	70.5		XrPt346779	124.7		XrPt344894	41.1		XrPt399317	50.2		XrPt401977	59.9
XrPt507940	71.7		XrPt347114	128.7		XrPt345840	44.1		XrPt506326	51.8		XrPt508400	60.5
XrPt390227	72		XrPt508711	129.6		XrPt399745	44.1		XrPt506678	53.1		XrPt509663	61.7	*
XrPt506066	72.4		XrPt389665	129.6		XrPt390428	44.1		XrPt508256	53.1		XrPt410869	63.6
XrPt505158	76.4		XrPt401893	129.6		XrPt400253	47.3		XrPt400815	53.1		XrPt411472	63.6
XrPt402654	76.7		XrPt400998	135.6	*	XrPt505745	47.3		XrPt509468	53.1		XrPt400528	63.9
XrPt506529	76.7		XrPt508051	138.7		XrPt401420	48.5		XrPt509455	53.1		XrPt346779	63.9
XrPt508487	77.9		XrPt346713	140.9		XrPt400226	52.2	*	XrPt505888	53.1		XrPt390442	63.9
XrPt506987	77.9	*	XrPt390263	142.2		XrPt509725	52.2	*	XrPt399304	53.1		XrPt347114	64.1
XrPt505525	77.9		XrPt401725	142.2		XrPt400126	65.8		XrPt505698	53.1		XrPt398845	64.1
XrPt347082	78.3		XrPt507940	142.6		XrPt400119	66.1		XrPt411112	54.6		XrPt402133	64.7
XrPt509209	80.3		XrPt389437	145		XrPt506992	67.4		XrPt509263	54.6		XrPt508440	65.7
XrPt505912	81		XrPt402654	145.6		XrPt389306	67.4		XrPt389931	54.6		XrPt411507	65.7
XrPt399653	82.1		XrPt506079	147.5		XrPt389738	67.4		XrPt401977	55.4		XrPt401592	65.9	*
XrPt505298	82.5		XrPt411297	147.5		XrPt119621	67.4		XrPt508400	56		XrPt505297	66.2	*
XrPt399541	82.5		XrPt402005	148.1		XrPt402575	67.4		XrPt402334	57.1		XrPt506412	66.2	*
XrPt398480	86.3		XrPt389621	148.1		XrPt389714	70.6		XrPt390563	57.7		XrPt399846	66.2
XrPt399922	86.9		XrPt508522	148.9		XrPt411112	76.9		XrPt507791	58.5		XrPt346708	66.2	*
XrPt400227	87.5		XrPt505912	150.8		XrPt508400	79.9		XrPt508161	58.5		XrPt401648	66.8
XrPt401306	90.4		XrPt399301	152.1		XrPt505336	84		XrPt399410	58.5		XrPt411130	67.7
XrPt411409	91.1		XrPt505949	152.1		XrPt390563	87.9		XrPt410869	58.7		XrPt398479	68.1
XrPt508054	93.2		XrPt506050	152.1		XrPt410869	90.1		XrPt346779	58.7		Xscsz1193L450	68.1
XrPt390262	93.6		XrPt508379	152.1		XrPt398845	90.1		XrPt390442	58.7		XrPt401326	68.4
XrPt402487	94.2		XrPt411264	152.1		XrPt402133	91.3		XrPt347114	63.1		XrPt508661	68.6
XrPt410839	94.2		XrPt508436	153		XrPt411507	92.2		XrPt401648	65.5		XrPt507512	68.6
XrPt66674	94.2		XrPt398480	156.6		XrPt401648	94		XrPt401969	70.7	*	XrPt508650	69.6
XrPt505396	94.5		XrPt399922	157		XrPt390698	94.9		XrPt507720	72.4	*	XrPt507147	70.7
XrPt398766	94.8		XrPt505711	157		XrPt401969	97.9		Xpr181L900	74.8		XrPt401639	71
XrPt410862	95.5		XrPt389307	157		Xapr6.11	101.1		XrPt347661	80.8	*	XrPt509027	71.3
XrPt506184	96.2		XrPt400777	157.4		XrPt401932	101.1		XrPt347340	81.2	*	XrPt346808	71.6
XrPt389998	97.8		XrPt506539	159.6		XrPt399340	109.2		XrPt402229	81.6	*	XrPt410790	71.6
XrPt400218	99.2		XrPt508054	160.2		XrPt347661	109.2		XrPt116344	81.6	*	XrPt348429	71.6
XrPt400220	100.1		XrPt390262	162.5		XrPt347340	109.8		XrPt116320	81.6	*	XrPt401114	71.6
XrPt400389	100.1		XrPt402487	162.5		XrPt402229	110.5		XrPt508711	81.6		XrPt507720	72.6
XrPt410789	100.5		XrPt348380	163.1		XrPt505897	110.5		XrPt389665	81.6		XrPt401932	72.6
XrPt402348	100.5	*	XrPt506786	163.1		XrPt116344	110.5		XrPt401893	81.8		XrPt399340	74.9
XrPt507305	101.2	*	XrPt506184	163.9		XrPt116320	110.5		XrPt509093	85.5		XrPt347661	74.9
XrPt346832	101.9		XrPt505393	164.3		XrPt389530	111.3		XrPt509579	86.4	*	XrPt347340	75.5
XrPt389282	102.9		XrPt505692	165.4		XrPt389665	111.3		XrPt505912	91.5	*	XrPt402229	76.4
XrPt400912	103.2		XrPt390381	165.4		XrPt401893	111.3		XrPt508399	92.3	*	XrPt508125	76.4
XrPt411144	103.2	*	XrPt402041	165.4		XrPt401391	112.2		XrPt399653	92.3		XrPt116344	76.4
XrPt508835	104.4	*	XrPt402337	165.4		XrPt505543	112.2		XrPt411293	92.3	*	XrPt505897	76.4
XrPt509343	104.9	*	XrPt402348	165.4		XrPt506744	112.2		XrPt506338	92.3		XrPt116320	76.4
XrPt389519	104.9	*	XrPt507305	165.6		XrPt398571	112.2		XrPt400084	92.3	*	XrPt507486	77.3
XrPt506554	105.6		XrPt346701	165.6		XrPt506466	112.2		XrPt400154	92.3	*	XrPt400879	78.2
XrPt399281	107.6		XrPt509216	166.4		XrPt402508	115.3		XrPt508504	92.3		XrPt343885	78.5
XrPt505673	109.1		XrPt507846	169.8		XrPt399263	115.3	*	XrPt507402	92.3		XrPt400392	78.8
XrPt411509	109.1		XrPt411144	169.8		XrPt507527	115.3		XrPt389699	92.3		XrPt390655	78.8
XrPt506404	109.5		XrPt508835	169.8		XrPt401104	117.9		XrPt505345	92.3	*	XrPt346073	80.3
XrPt506681	109.5		XrPt402304	170.3		XrPt390498	117.9		XrPt505292	92.3	*	XrPt401736	80.3
XrPt505709	110.6		XrPt389519	173.1		XrPt401725	117.9		XrPt506014	92.3	*	XrPt401725	80.3
XrPt348747	114.6		XrPt505709	176.4		XrPt507940	118.1		XrPt506069	92.3	*	XrPt507940	83
XrPt402208	115.3		XrPt349205	179		XrPt506227	120.7		XrPt509242	92.3		XrPt509477	85.6	*
XrPt347307	115.3		XrPt410804	179.8		XrPt115453	122.2		XrPt398480	94.8		XrPt390227	86.7
XrPt389853	116.3		XrPt411401	185.1		XrPt508399	131.8		XrPt399922	94.9	*	XrPt506066	87.5	*
XrPt506171	116.3		XrPt399399	185.1		XrPt506338	131.8		XrPt400777	96.5		XrPt402654	89.3
XrPt410952	116.6	*	XrPt509330	185.1	*	XrPt400084	132.1		XrPt398472	96.5		XrPt347082	89.9
XrPt507032	116.6		XrPt401579	185.1	*	XrPt505292	132.4		XrPt399561	97.1		XrPt506334	90.2
XrPt121523	120.5		XrPt389311	187.8		XrPt506014	133		XrPt390711	97.3		XrPt509209	90.2	*
XrPt399755	120.5		XrPt411086	188		XrPt506069	133		XrPt410796	97.3		XrPt505912	93.2
XrPt509735	120.8		XrPt400921	188		XrPt344179	134.5		XrPt505332	97.3		XrPt508399	94.5
XrPt390501	126.7		XrPt400157	188		XrPt398480	137.8		XrPt506831	98.2	*	XrPt411293	94.5
XrPt399427	127.1		XrPt401083	190.2		XrPt505711	137.8		XrPt390517	99.3		XrPt400084	94.8
XrPt411086	128		XrPt399540	191.6		XrPt389307	137.8		XrPt505184	99.7		XrPt506668	94.8
XrPt400921	128.3	*	Xscm078	193.4		XrPt400777	138.9		XrPt401061	100.4		XrPt506836	95.4
XrPt347845	128.3		XrPt508220	195.2		XrPt390711	140.1		XrPt505989	100.6		XrPt506050	95.7
XrPt506513	128.3		XrPt508562	200.6		XrPt410796	140.4		XrPt66674	100.6		XrPt400312	96
XrPt506980	128.3		XrPt508059	201.8	*	XrPt505332	142.7		XrPt410839	100.6		XrPt390007	96
XrPt508477	128.3		XrPt508574	203.5		XrPt505184	149.7		XrPt505396	101		XrPt390647	96
XrPt402030	134.7		Xscm046	205.4		XrPt401061	151.1		XrPt400370	101.2		XrPt400154	96
XrPt509500	134.7		XrPt506201	205.4		XrPt389324	151.7		XrPt410862	101.8		XrPt389699	96
XrPt411128	134.7		XrPt507002	205.4		XrPt505695	151.7		XrPt506184	101.9		XrPt508504	96
XrPt399540	135.4		XrPt506755	209.3		XrPt389399	151.7		XrPt389998	102.1		XrPt507402	96
XrPt508723	135.4		XrPt508919	209.9		XrPt400366	153.8		XrPt505695	102.1		XrPt505345	96
XrPt401129	135.4		XrPt400005	209.9		XrPt399916	153.8		XrPt389399	102.7		XrPt505292	96
XrPt507463	135.7		XrPt506799	209.9		XrPt346701	153.8		XrPt400218	103.1		XrPt506014	97.2
XrPt509019	135.7		XrPt400819	209.9		XrPt509216	154		XrPt400220	103.1		XrPt506069	98.2
XrPt389765	135.7		XrPt506868	210.3		XrPt505915	154		XrPt506839	103.1		XrPt398480	100.5
XrPt507061	136.1		XrPt507753	211.4		XrPt402459	154.6		Xpr143L1600	103.7		XrPt399922	101
XrPt509402	136.4		XrPt390083	213.4	*	XrPt508207	154.6		XrPt400389	103.7		XrPt401306	101.9
XrPt389594	136.4		XrPt507896	213.4	*	XrPt505673	158.4		XrPt410789	103.9		XrPt505711	101.9
XrPt506201	136.4		XrPt507199	213.4	*	XrPt508779	158.4	*	XrPt399680	103.9		XrPt400777	103.8
XrPt507002	136.4		XrPt399834	213.4	*	XrPt399935	158.4		XrPt400514	103.9		XrPt399561	104.4
XrPt506755	137.2		Xpsr454L1000	219.6		XrPt402205	158.4		XrPt346832	104.3		XrPt390711	104.4
XrPt508919	137.5		XrPt508462	221.9		XrPt398629	158.4		XrPt389282	104.5		XrPt410796	104.4
XrPt509333	137.5		XrPt344347	222.1		XrPt411236	158.4	*	XrPt400912	104.5		XrPt505332	105.4
XrPt506099	139.9		XrPt509645	224.5		XrPt402089	158.4	*	Xpr36L750	108		XrPt410892	106.7
XrPt506263	139.9		XrPt505520	226.2		XrPt509319	158.4	*	XrPt505459	111.6		XrPt399827	106.7
XrPt399879	139.9		XrPt505974	226.2		XrPt401911	158.4		XrPt348510	112		XrPt505356	107.8
XrPt507589	139.9		XrPt121400	229.7		XrPt411220	158.4	*	XrPt348380	112		XrPt507222	108.1
XrPt508321	141.4		XrPt509095	229.7		XrPt506637	158.4	*	XrPt506786	112.2		XrPt508620	108.1
XrPt411161	141.4		XrPt509284	229.9		XrPt399917	158.4		XrPt509183	114.8	*	XrPt505695	108.1
XrPt401881	148.6		XrPt399716	229.9		XrPt411266	158.4		XrPt400459	117.2		XrPt389399	108.1
XrPt346573	152.5		XrPt507673	229.9		XrPt508549	159		XrPt410850	118		XrPt508525	108.1
XrPt506799	152.5	*	XrPt398540	229.9		XrPt400459	161		XrPt505709	118		XrPt400218	108.1
XrPt400005	152.5		XrPt509447	229.9		XrPt505829	161.3		XrPt344263	118.2		XrPt507385	108.4
XrPt400819	152.5	*	XrPt506194	229.9		XrPt505709	161.8		XrPt348747	119.5		XrPt390063	108.7
XrPt506868	154		XrPt400919	229.9		XrPt349205	161.8		XrPt402208	120.1	*	XrPt508352	109
XrPt509351	154	*	XrPt402096	229.9		XrPt507032	161.8		XrPt399755	120.1		XrPt507836	109.3
XrPt505444	154		XrPt507881	229.9		XrPt121523	161.8		XrPt509735	121.9	*	XrPt509643	109.3
XrPt411511	154	*	XrPt398616	229.9		XrPt399945	161.8		XrPt505212	121.9		XrPt398733	109.3
XrPt401054	155.8	*	XrPt346894	229.9		XrPt401941	161.8		XrPt411401	126.4		XrPt507470	109.3
XrPt401931	161.6		XrPt411416	229.9		XrPt401505	161.8		XrPt389305	126.6		XrPt400220	109.3
XrPt400768	161.6		XrPt505789	229.9		XrPt390656	161.8		XrPt400555	127		XrPt400389	109.3
XrPt505197	162		XrPt411364	229.9		XrPt399931	161.8		XrPt401579	127		XrPt410789	109.3
XrPt508362	162		XrPt507683	229.9		XrPt400994	161.8		XrPt399399	127		XrPt402348	109.3
XrPt507933	162		XrPt400158	229.9		XrPt389592	161.8		XrPt509330	127		XrPt507305	109.6
XrPt389735	162.4		XrPt400358	229.9		XrPt390670	162.1		XrPt389311	127.4		XrPt346832	112.4	*
XrPt401885	163.1		XrPt505559	229.9		XrPt507187	162.1		XrPt411086	127.4		XrPt348380	112.4
XrPt402383	168.5		XrPt389538	229.9		XrPt507659	162.1		XrPt400921	127.4		XrPt506786	113.7
XrPt401099	176.1		XrPt402659	229.9		XrPt505212	162.1		XrPt400157	127.4		XrPt507846	116.8
XrPt506374	178.7		XrPt400211	229.9		XrPt411401	165.6		XrPt401083	128.1		XrPt411144	116.8
XrPt505883	178.7		XrPt506495	229.9		XrPt400555	166.2		XrPt411128	128.1		XrPt508835	116.8
XrPt505482	178.7		XrPt506000	229.9		XrPt399399	166.2		XrPt399540	130		XrPt509183	120.8
XrPt401488	178.7		XrPt401152	229.9		XrPt389311	167.4		XrPt505252	130.4		XrPt411509	125.8
XrPt399710	178.7		XrPt398593	229.9		XrPt411086	167.4		XrPt506969	130.6		XrPt508824	126.1
XrPt506742	178.7		XrPt402242	229.9		XrPt506549	167.4		Xscm078	131		XrPt398507	127.2
XrPt401227	178.7		XrPt509080	229.9		XrPt507025	167.4		XrPt401129	131		XrPt506415	127.2
XrPt509335	178.7		XrPt389991	230.1		XrPt506476	167.4		XrPt508723	131		XrPt505895	127.2
XrPt505433	178.7		XrPt401651	230.3		XrPt410898	167.4		XrPt507463	131.2		XrPt508108	127.5
XrPt505248	178.7		XrPt400273	231		XrPt389375	167.9		XrPt506201	131.2		XrPt390690	127.5
XrPt509095	182.3		XrPt402451	231.8		XrPt400157	167.9		XrPt507002	131.2		XrPt400485	127.5
XrPt401449	182.3		XrPt509513	236		XrPt401083	168.2		XrPt506755	131.8		XrPt345374	127.5
XrPt509284	182.3		XrPt390228	236		XrPt508477	168.2		XrPt508919	131.8		XrPt508549	127.8
XrPt346894	182.3		XrPt507169	236		XrPt347845	168.2		XrPt507589	131.8		XrPt347562	127.8
XrPt398616	182.3		XrPt389350	236.4		XrPt506980	168.2		XrPt506263	131.8		XrPt506193	127.8
XrPt398540	182.3		XrPt400702	236.4		XrPt506513	168.2		XrPt399879	131.8		XrPt400459	129.2
XrPt390089	182.3		Xpsr148	239.1		XrPt402030	171.1		XrPt508321	134.1		XrPt505709	131.1
XrPt507683	182.3		XrPt401346	241		XrPt411128	171.1		XrPt411161	134.3		XrPt402304	133
XrPt507673	182.3		XrPt389611	242		XrPt399540	171.9		XrPt508596	135.3		XrPt348747	136.8
XrPt400919	182.3		XrPt506236	242.6		XrPt505252	172.8		XrPt346573	137.1		XrPt347307	136.8
XrPt509447	182.3		XrPt507704	244.3		XrPt389765	174.1		XrPt400054	137.6		XrPt389853	137.7
XrPt402096	182.3		XrPt507196	244.7		XrPt400819	174.1		XrPt506799	137.6		XrPt506171	137.7
XrPt507881	182.3		XrPt509334	244.7		XrPt400005	174.1		XrPt400005	137.6		XrPt410952	137.7
XrPt411364	182.3		XrPt506570	245.8		XrPt506868	174.7		XrPt400819	137.6		XrPt121523	139.1
XrPt411416	182.3		XrPt507821	245.8		XrPt411511	174.7		XrPt506868	137.8		XrPt399755	139.1
XrPt506194	182.3		XrPt347005	247.4		XrPt401054	179.4		XrPt507115	137.8		XrPt509735	139.8
XrPt505789	182.3		XrPt509172	248.3		XrPt399825	181.9		XrPt399825	140.4		XrPt347925	142.7
XrPt506000	182.3		XrPt399991	249.1		XrPt399803	182.2		XrPt508076	143.1		XrPt411401	143.4
XrPt400358	182.3		XrPt400060	249.1		Xpsr454L1000	183.9		XrPt507840	143.1		XrPt389810	143.7
XrPt400211	182.3		XrPt505959	249.1		XrPt505261	190.3		XrPt401099	144.1		XrPt401125	143.7
XrPt398593	182.3		XrPt508690	249.1		XrPt506869	193.2		XrPt389991	144.1		XrPt401549	143.7
XrPt509724	182.3		XrPt401867	249.1		XrPt508076	195.9		XrPt509095	144.5		XrPt347711	145.1
XrPt505559	182.3		XrPt399245	249.1		XrPt389917	195.9		XrPt401449	144.7		XrPt63687	147.6	*
XrPt400158	182.3		XrPt390337	249.1		XrPt505662	196.5		XrPt509284	145.1		XrPt389305	149.8
XrPt402659	182.3		XrPt509484	249.1		XrPt344347	197.4		XrPt411416	145.1		XrPt401579	149.8
XrPt400918	182.3		XrPt66560	251.9		XrPt389617	199.4		XrPt398616	145.1		XrPt399399	149.8
XrPt400203	182.3		XrPt348234	252.1		XrPt121400	201.5		XrPt507673	145.1		XrPt509330	149.8
XrPt506495	182.3		XrPt401314	254.3		XrPt509284	201.8		XrPt507683	145.1		XrPt389311	151
XrPt400179	182.3		XrPt509063	254.9		XrPt506194	201.8		XrPt346894	145.1		XrPt411086	151
XrPt402242	182.3		XrPt509167	255.7		XrPt411364	201.8		XrPt398540	145.1		XrPt400921	151
XrPt401152	182.3		XrPt507715	255.7		XrPt411416	201.8		XrPt411364	145.1		XrPt506476	151
XrPt509080	182.3		XrPt507397	255.7		XrPt505789	201.8		XrPt400919	145.1		XrPt506549	151
XrPt401651	182.3		XrPt390636	256.3		XrPt507881	201.8		XrPt507881	145.1		XrPt410898	151
XrPt401404	182.3		Xapr6.23	256.3		XrPt402096	201.8		XrPt402096	145.1		XrPt507025	151
XrPt401674	182.3		XrPt505447	256.3		XrPt509447	201.8		XrPt505789	145.1		XrPt389375	151.9
XrPt411030	183		XrPt507320	258.5		XrPt400919	201.8		XrPt506194	145.1		XrPt390525	154.1
XrPt506626	183		XrPt410904	259.1		XrPt400158	201.8		XrPt509447	145.1		XrPt390083	155
XrPt399377	183.6		XrPt509154	259.1		XrPt389538	201.8		XrPt505559	145.1		XrPt507896	155
XrPt401201	184		XrPt390153	259.1		XrPt400358	201.8		XrPt509724	145.1		XrPt507199	155
XrPt411126	184		XrPt400935	261.7		XrPt402242	201.8		XrPt398593	145.1		XrPt399834	155
XrPt400044	184		XrPt401529	262.7		XrPt398616	201.8		XrPt400211	145.1		XrPt507753	155.9
XrPt402020	184.6		XrPt411510	263.6		XrPt346894	201.8		XrPt400358	145.1		Xscm078	156.3
XrPt399489	185.6		XrPt508548	263.6		XrPt398540	201.8		XrPt401152	145.1		XrPt507463	156.6
XrPt402015	185.6		XrPt399452	263.6		XrPt509080	201.8		XrPt400203	145.1		XrPt389264	157.1
XrPt507674	185.6		XrPt508371	263.6		XrPt401651	202.1		XrPt506000	145.1		XrPt509655	157.1
XrPt402447	185.6		XrPt410775	265.8		XrPt401404	202.1		XrPt506495	145.1		Xscm046	157.1
XrPt399406	186.2		XrPt402522	265.8		XrPt401674	202.4		XrPt400179	145.1		Xscsz1194L750	157.1
XrPt115622	188		XrPt505870	266.5		XrPt400209	203		XrPt400918	145.1		XrPt389765	158.8
XrPt401470	188.6		XrPt117080	266.7		XrPt411030	204.8		XrPt509080	145.3		XrPt506201	158.8
XrPt507728	190.7		XrPt398738	268.7		XrPt400273	206.4		XrPt401651	145.3		XrPt507002	158.8
XrPt346726	190.7		XrPt507353	268.9		XrPt389825	210.1		XrPt400209	145.3		XrPt506755	159.8
XrPt509538	190.7		XrPt508647	268.9		XrPt506212	211		XrPt399633	146.2		XrPt508919	159.8
XrPt508843	190.7		XrPt507573	270.1	*	XrPt402552	212.4		XrPt400273	146.6		XrPt410896	160.1
XrPt509143	190.7					XrPt402475	212.4		XrPt506626	146.6		XrPt399475	160.1
XrPt399691	190.7					XrPt509171	212.4		XrPt399377	147		XrPt508220	160.1
XrPt507745	191.1					XrPt506039	212.4		XrPt401201	147.5		XrPt507266	160.1
XrPt507631	191.8					XrPt506500	212.4		XrPt401239	148.3	*	XrPt400432	160.1
XrPt389350	192.5					XrPt389722	212.4		XrPt507704	149.6		XrPt398526	160.1
XrPt400702	192.8					XrPt398543	212.4		XrPt399763	150.1		XrPt389946	160.1
XrPt372662	193.9					XrPt400841	212.7		XrPt507169	150.3		XrPt509333	160.1
XrPt400168	196.1					XrPt399691	212.7		XrPt389825	150.9		XrPt506099	163.9
XrPt399933	200					XrPt507745	212.7		XrPt398543	150.9		XrPt399879	163.9
XrPt508092	200					XrPt400168	215.3		XrPt400841	151.3		XrPt507589	163.9
XrPt508981	200					XrPt505984	215.3		XrPt506614	151.7		XrPt506263	163.9
XrPt401056	201					XrPt509045	216.5		XrPt400044	152.8		XrPt508321	164.2
XrPt400608	201.3					XrPt390317	221.9		XrPt402015	152.8		XrPt411161	164.5
XrPt509617	202.5					XrPt505505	223.4		XrPt402447	152.8		XrPt399888	167.6
XrPt399421	202.5					Xpsr148	225.4		XrPt507674	152.8		XrPt401881	169
XrPt506808	202.5					XrPt505921	226.7		XrPt399406	153.9		XrPt509351	169
XrPt507592	202.5					XrPt505364	226.7		XrPt509143	153.9		XrPt505444	169
XrPt400840	204.2					XrPt398626	226.7		XrPt399691	153.9		XrPt401054	169
XrPt401346	204.5					XrPt390566	226.7		XrPt507745	153.9		XrPt400331	171.1
XrPt389656	204.5					XrPt347391	226.7		XrPt347758	153.9		XrPt401195	172.1
XrPt507821	204.5					XrPt505654	227.6		XrPt401088	155.5		XrPt399825	172.8
XrPt347005	206.5					XrPt505267	228.1		XrPt400608	157.1		XrPt505520	175.3
XrPt505885	207.2					XrPt400800	228.4		XrPt509617	159.9		XrPt505974	175.6
XrPt346177	213.2	*				XrPt399416	228.7		XrPt506126	159.9		XrPt390712	177.2
XrPt66560	213.9	*				XrPt505447	228.7		XrPt399421	159.9		XrPt508818	177.2	*
XrPt348234	213.9	*				XrPt507320	236		XrPt506808	159.9		XrPt402383	180.5
XrPt509063	215	*				XrPt410904	237.5		XrPt507592	160.1		XrPt506575	181
XrPt509390	216.3	*				XrPt390153	237.8		XrPt505885	162		XrPt505662	181
XrPt402038	218.6	*				XrPt402107	238.5		XrPt347391	162		XrPt389991	181
XrPt509167	219.3					XrPt389402	243.2		XrPt505654	163		XrPt509095	183.4
XrPt509271	219.3	*				XrPt390286	244.5		XrPt390768	166.1		XrPt401449	183.4
XrPt507715	219.3					XrPt401711	245.2		XrPt116979	169		XrPt509284	183.7
XrPt507397	219.7					XrPt505951	246.2		XrPt410775	170.9		XrPt398555	184.7
XrPt390636	222.7					XrPt505812	247.6		XrPt402522	170.9		XrPt398616	184.7
XrPt400557	225.2					Xapr6.6	248.6		XrPt399312	171.3		XrPt402096	184.7
XrPt398556	225.5					XrPt116930	249.1		XrPt400425	171.3		XrPt507673	184.7
XrPt505250	231.1					XrPt411514	249.1		XrPt400694	171.3		XrPt507683	184.7
XrPt505267	232.3					XrPt398738	250.4		XrPt506093	171.3		XrPt346894	184.7
XrPt400800	232.3								XrPt398681	171.3		XrPt398540	184.7
XrPt399416	232.9								XrPt400483	171.3		XrPt505789	184.7
XrPt505447	232.9								XrPt390094	172.8		XrPt506194	184.7
XrPt507320	240								XrPt507299	181.8		XrPt509447	184.7
XrPt401636	241.7								XrPt347048	182.2		XrPt400919	184.7
XrPt410775	243.1								XrPt399587	182.2		XrPt411416	184.7
XrPt402522	243.4								XrPt505935	182.4		XrPt411364	184.7
XrPt505870	244.1								XrPt399985	182.9		XrPt507881	184.7
XrPt389705	245.6											XrPt398593	184.7
XrPt507626	246.3	*										XrPt402242	184.7
XrPt507181	246.3	*										XrPt401152	184.7
XrPt402018	250.1											XrPt505559	184.7
XrPt343814	251.1											XrPt400158	184.7
XrPt401527	251.4											XrPt400211	184.7
XrPt401259	252.1											XrPt509724	184.7
XrPt400682	253.2											XrPt402659	184.7
XrPt400730	253.2											XrPt506000	184.7
XrPt347048	261.7											XrPt506495	184.7
XrPt399777	261.7											XrPt390089	184.7
XrPt399587	262											XrPt509080	185.4
XrPt399635	264.2											XrPt401674	186.1
												XrPt399633	187.2
												XrPt400273	187.6
												XrPt402451	187.6
												XrPt507704	189
												XrPt509334	189.3
												XrPt507196	189.3
												XrPt399763	189.9
												XrPt507169	189.9
												XrPt411354	189.9
												XrPt398543	189.9
												XrPt400841	190.8
												XrPt399691	190.8
												XrPt509143	190.8
												XrPt507745	191.1
												XrPt507631	192.6
												XrPt389350	192.9
												XrPt400702	192.9
												XrPt372662	192.9
												XrPt399933	194.3
												XrPt508981	194.3
												XrPt508092	194.3
												XrPt401056	194.3
												XrPt400608	195.9
												XrPt509617	196.9
												XrPt399421	197.2
												XrPt506808	197.2
												XrPt507592	197.2
												XrPt507821	197.2
												XrPt347005	198.1
												XrPt66560	203.5
												XrPt348234	203.5
												XrPt401314	205.7
												XrPt509063	206
												XrPt509167	206.4
												XrPt507715	206.4
												XrPt509271	206.4
												XrPt507397	206.9
												XrPt390636	206.9
												XrPt116979	209.3
												XrPt505250	212.3
												XrPt506473	213.5
												XrPt399597	213.8
												XrPt402480	213.8
												XrPt508374	213.8
												XrPt402276	213.8
												XrPt507838	213.8
												XrPt401486	213.8
												XrPt506178	215
												XrPt372435	216
												XrPt505383	216.6
												XrPt506435	216.6
												XrPt508968	216.6
												XrPt389611	216.6
												XrPt411373	216.9
												XrPt400077	218.3
												XrPt509172	219.5
												XrPt509395	219.5
												XrPt508388	219.5
												XrPt505267	219.8
												XrPt400800	219.8
												XrPt399416	219.8
												XrPt505986	220.1
												XrPt505447	220.1
												XrPt507320	225.5
												XrPt390603	226.8
												XrPt509721	226.8
												XrPt410904	227.5
												XrPt390153	227.5
												XrPt401636	228.7
												XrPt507643	230.3
												XrPt390469	230.3
												XrPt507502	230.3
												XrPt410775	231.2
												XrPt402522	231.2
												XrPt505870	231.7
												XrPt116930	231.7	*
												XrPt117080	231.7
												XrPt400694	232.1
												XrPt506219	232.8
												XrPt508647	232.8
												XrPt507353	232.8
												XrPt402526	232.8
												XrPt401467	233.5

## Sheet: Shared markers
	main shared markers order	occurence in genetic maps	cosegregating shared markers
	XrPt390046	(H,S)
	Xscsz980LL650	(L,M)
	XrPt410769	(H,S)
	XrPt390764	(L,M)	XrPt347012	(L,M)	XrPt345433	(L,M)
	XrPt120754	(H,K,S)
	XrPt343387	(H,S)
	XrPt400398	(H,K,S)
	XrPt402620	(H,S)
	XrPt401305	(K,L,M,S)
	XrPt506337	(K,L,M,S)
	XrPt401102	(L,M)
	XrPt401874	(L,M)	XrPt410992	(L,M)
	XrPt402328	(K,L,M,S)	XrPt400907	(L,M,S)	XrPt505404	(L,S)	XrPt399613	(L,S)	XrPt402420	(L,S)	XrPt401478	(L,S)
	XrPt400431	(L,S)
	XrPt506274	(L,S)	XrPt507326	(L,S)
	XrPt389693	(L,M)
	XrPt506512	(K,L)
	XrPt410881	(K,L)
	XrPt402114	(K,L)	XrPt401898	(K,L)
	XrPt345840	(K,L,M,S)	XrPt507607	(K,L,M,S)	XrPt410859	(K,L,M,S)	XrPt344894	(K,L,M,S)	XrPt389973	(K,L,M,S)	XrPt505351	(K,L,M,S)
	XrPt390428	(L,M,S)	XrPt399745	(L,S)
	XrPt400253	(L,M)
	XrPt401420	(K,L,M)	XrPt505745	(K,L,M)
	XrPt400126	(L,S)
	XrPt509455	(K,M)
	XrPt506992	(K,L,S)
	XrPt389714	(K,L,S)	XrPt389306	(L,S)	XrPt119621	(L,S)	XrPt402575	(L,S)	XrPt389738	(L,S)
	XrPt411112	(L,M)
	XrPt401977	(M,S)
	XrPt508400	(L,M,S)
	XrPt390563	(L,M)
	XrPt410869	(L,M,S)
	XrPt347114	(K,M,S)	XrPt390442	(M,S)	XrPt346779	(K,M,S)
	XrPt402133	(L,S)	XrPt398845	(L,S)
	XrPt411507	(L,S)
	XrPt401648	(L,M,S)
	XrPt401969	(L,M)
	XrPt507720	(M,S)
	XrPt399340	(H,L,S)	XrPt401932	(H,L,S)
	XrPt347340	(L,M,S)	XrPt347661	(L,M,S)
	XrPt402229	(H,L,M,S)
	XrPt116320	(H,L,M,S)	XrPt505897	(H,L,S)	XrPt116344	(H,L,M,S)	XrPt508125	(H,S)
	XrPt389530	(H,L)
	XrPt401893	(H,K,L,M)	XrPt508711	(H,M)	XrPt389665	(H,K,L,M)
	XrPt343885	(H,S)
	XrPt509093	(H,M)
	XrPt400998	(H,K)
	XrPt507940	(H,K,L,S)	XrPt401725	(H,K,L,S)
	XrPt390227	(H,S)
	XrPt506066	(H,S)
	XrPt402654	(H,K,S)
	XrPt347082	(H,S)
	XrPt509209	(H,S)
	XrPt505912	(H,K,M,S)
	XrPt399653	(H,M)
	XrPt508399	(L,M,S)
	XrPt400084	(L,M,S)	XrPt506338	(L,M)	XrPt411293	(M,S)
	XrPt505292	(L,M,S)	XrPt507402	(M,S)	XrPt389699	(M,S)	XrPt505345	(M,S)	XrPt400154	(M,S)	XrPt508504	(M,S)
	XrPt506014	(L,M,S)
	XrPt506069	(L,M,S)
	XrPt398480	(H,K,L,M,S)
	XrPt399922	(H,K,M,S)
	XrPt401306	(H,S)
	XrPt400777	(K,L,M,S)	XrPt389307	(K,L)	XrPt505711	(K,L,S)
	XrPt508054	(H,K)
	XrPt399561	(M,S)
	XrPt390262	(H,K)
	XrPt390711	(L,M,S)
	XrPt402487	(H,K)
	XrPt410796	(L,M,S)
	XrPt505332	(L,M,S)
	XrPt505184	(L,M)
	XrPt401061	(L,M)
	XrPt505396	(H,M)	XrPt66674	(H,M)	XrPt410839	(H,M)
	XrPt410862	(H,M)
	XrPt506184	(H,K,M)
	XrPt389998	(H,M)
	XrPt389399	(L,M,S)	XrPt505695	(L,M,S)
	XrPt400218	(H,M,S)
	XrPt400220	(H,M,S)
	XrPt410789	(H,M,S)	XrPt400389	(H,M,S)
	XrPt507305	(H,K,S)	XrPt402348	(H,K,S)
	XrPt346832	(H,M,S)
	XrPt509216	(K,L)	XrPt346701	(K,L)
	XrPt389282	(H,M)
	XrPt400912	(H,M)
	XrPt506786	(M,S)	XrPt348380	(M,S)
	XrPt508835	(H,K,S)	XrPt411144	(H,K,S)
	XrPt389519	(H,K)
	XrPt509183	(M,S)
	XrPt505673	(H,L)
	XrPt411509	(H,S)
	XrPt508549	(L,S)
	XrPt400459	(L,M,S)
	XrPt505709	(H,K,L,M,S)
	XrPt348747	(H,M,S)
	XrPt349205	(K,L)
	XrPt402208	(H,M)
	XrPt347307	(H,S)
	XrPt389853	(H,S)
	XrPt410952	(H,S)	XrPt506171	(H,S)
	XrPt121523	(H,L,S)	XrPt507032	(H,L)
	XrPt509735	(H,M,S)	XrPt399755	(H,M,S)
	XrPt411401	(K,L,M,S)	XrPt505212	(L,M)
	XrPt389305	(M,S)
	XrPt400555	(L,M)
	XrPt389311	(K,L,M,S)	XrPt401579	(K,M,S)	XrPt509330	(K,M,S)	XrPt399399	(K,L,M,S)
	XrPt411086	(H,K,L,M,S)
	XrPt400921	(H,K,M,S)
	XrPt389375	(L,S)	XrPt410898	(L,S)	XrPt506476	(L,S)	XrPt507025	(L,S)	XrPt506549	(L,S)
	XrPt401083	(K,L,M)	XrPt400157	(K,L,M)
	XrPt402030	(H,L)	XrPt506980	(H,L)	XrPt347845	(H,L)	XrPt508477	(H,L)	XrPt506513	(H,L)
	XrPt399540	(H,K,L,M)	XrPt411128	(H,L,M)
	Xscm078	(K,M,S)
	XrPt505252	(L,M)
	XrPt507463	(H,M,S)
	Xscm046	(K,S)
	XrPt389765	(H,L,S)
	XrPt506755	(H,K,M,S)	XrPt507002	(H,K,M,S)	XrPt506201	(H,K,M,S)
	XrPt508919	(H,K,M,S)
	XrPt506099	(H,S)	XrPt509333	(H,S)
	XrPt508321	(H,M,S)	XrPt507589	(H,M,S)	XrPt399879	(H,M,S)	XrPt506263	(H,M,S)
	XrPt411161	(H,M,S)
	XrPt401881	(H,S)
	XrPt346573	(H,M)
	XrPt506868	(H,K,L,M)	XrPt400819	(H,K,L,M)	XrPt400005	(H,K,L,M)	XrPt506799	(H,K,M)
	XrPt401054	(H,L,S)	XrPt411511	(H,L)	XrPt505444	(H,S)	XrPt509351	(H,S)
	XrPt399825	(L,M,S)
	XrPt402383	(H,S)
	Xpsr454L1000	(K,L)
	XrPt508076	(L,M)
	XrPt401099	(H,M)
	XrPt505662	(L,S)
	XrPt344347	(K,L)
	XrPt509095	(H,K,M,S)
	XrPt121400	(K,L)
	XrPt401449	(H,M,S)
	XrPt509284	(H,K,L,M,S)
	XrPt509080	(H,K,L,M,S)	XrPt507683	(H,K,M,S)	XrPt507673	(H,K,M,S)	XrPt506495	(H,K,M,S)	XrPt506000	(H,K,M,S)	XrPt389538	(K,L)	XrPt506194	(H,K,L,M,S)	XrPt505789	(H,K,L,M,S)	XrPt400919	(H,K,L,M,S)	XrPt509447	(H,K,L,M,S)	XrPt411364	(H,K,L,M,S)	XrPt346894	(H,K,L,M,S)	XrPt398540	(H,K,L,M,S)	XrPt411416	(H,K,L,M,S)	XrPt398616	(H,K,L,M,S)	XrPt390089	(H,S)	XrPt400358	(H,K,L,M)	XrPt400211	(H,K,M,S)	XrPt398593	(H,K,M,S)	XrPt400158	(H,K,L,S)	XrPt509724	(H,M,S)	XrPt402096	(H,K,L,M,S)	XrPt505559	(H,K,M,S)	XrPt402659	(H,K,S)	XrPt400918
	XrPt401651	(H,K,L,M)
	XrPt401674	(H,L,S)	XrPt401404	(H,L)
	XrPt400209	(L,M)
	XrPt411030	(H,L)
	XrPt399633	(M,S)
	XrPt400273	(K,L,M,S)
	XrPt399377	(H,M)	XrPt506626	(H,M)
	XrPt401201	(H,M)
	XrPt507704	(M,S)
	XrPt399763	(M,S)
	XrPt507169	(M,S)
	XrPt389825	(L,M)
	XrPt400841	(L,M,S)	XrPt398543	(L,M,S)
	XrPt400044	(H,M)
	XrPt399406	(H,M)	XrPt402015	(H,M)	XrPt402447	(H,M)	XrPt507674	(H,M)
	XrPt507745	(H,L,M,S)	XrPt399691	(H,L,M,S)	XrPt509143	(H,M,S)
	XrPt507631	(H,S)
	XrPt389350	(H,K,S)
	XrPt400702	(H,K,S)
	XrPt372662	(H,S)
	XrPt400168	(H,L)
	XrPt399933	(H,S)
	Xpsr148	(K,L)
	XrPt401056	(H,S)	XrPt508981	(H,S)	XrPt508092	(H,S)
	XrPt400608	(H,M,S)
	XrPt509617	(H,M,S)
	XrPt399421	(H,M,S)
	XrPt507592	(H,M,S)	XrPt506808	(H,M,S)
	XrPt401346	(H,K)
	XrPt347005	(H,K,S)	XrPt507821	(H,K,S)
	XrPt505885	(H,M)
	XrPt66560	(H,K,S)
	XrPt505654	(L,M)	XrPt347391	(L,M)
	XrPt348234	(H,K,S)
	XrPt401314	(K,S)
	XrPt509063	(H,K,S)
	XrPt509167	(H,K,S)
	XrPt507397	(H,K,S)	XrPt509271	(H,S)	XrPt507715	(H,K,S)
	XrPt390636	(H,K,S)
	XrPt116979	(M,S)
	XrPt505250	(H,S)
	XrPt505267	(H,L,S)
	XrPt399416	(H,L,S)	XrPt400800	(H,L,S)
	XrPt507320	(H,K,L,S)	XrPt505447	(H,K,L,S)
	XrPt410904	(K,L,S)
	XrPt390153	(K,L,S)
	XrPt401636	(H,S)
	XrPt410775	(H,K,M,S)
	XrPt402522	(H,K,M,S)
	XrPt505870	(H,K,S)
	XrPt116930	(L,S)
	XrPt400694	(M,S)
	XrPt398738	(K,L)
	XrPt347048	(H,M)
	XrPt399587	(H,M)
[truncated: 11 more columns]

## Sheet: Shared and unique markers
	Shared markers order		Unique markers orders
	XrPt390046		Group H6R	Group K6R	Group L6R	Group M6R	Group S6R
	Xscsz980L650		XrPt346841	Xpsr106.1L350	XrPt400291	XrPt507440	XrPt401578
	XrPt410769		XrPt400031	XrPt507100	XrPt506387	XrPt401349	XrPt402418
	XrPt347012		XrPt398814	XrPt505168	XrPt400293	XrPt507629	Xscsz777L600
	XrPt345433		XrPt400865	XrPt399365	XrPt401517	XrPt389418	XrPt410999
	XrPt390764		XrPt401445	XrPt401117	XrPt389914	XrPt507862	XrPt400396
	XrPt120754		XrPt348489	XrPt506313	Xapr6.1	XrPt505541	XrPt509663
	XrPt343387		XrPt344921	XrPt508289	XrPt505804	XrPt411453	XrPt411472
	XrPt400398		XrPt505139	XrPt402513	XrPt402243	XrPt507429	XrPt400528
	XrPt402620		XrPt400697	XrPt401137	XrPt506177	XrPt507786	XrPt508440
	XrPt401305		XrPt507634	XrPt121347	XrPt508112	XrPt400887	XrPt401592
	XrPt506337		XrPt411237	XrPt410765	XrPt400226	XrPt398478	XrPt505297
	XrPt401102		XrPt506825	Xscm176	XrPt509725	XrPt389411	XrPt399846
	XrPt410992		XrPt507327	XrPt116080	XrPt400119	XrPt398714	XrPt346708
	XrPt401874		XrPt507383	XrPt402510	XrPt505336	XrPt399317	XrPt411130
	XrPt400907		XrPt507920	XrPt508051	XrPt390698	XrPt506326	XrPt398479
	XrPt505404		XrPt411242	XrPt346713	Xapr6.11	XrPt506678	Xscsz1193L450
	XrPt399613		XrPt508019	XrPt390263	XrPt401391	XrPt508256	XrPt401326
	XrPt402420		XrPt505158	XrPt389437	XrPt505543	XrPt400815	XrPt508661
	XrPt401478		XrPt506529	XrPt506079	XrPt506744	XrPt509468	XrPt507512
	XrPt402328		XrPt508487	XrPt411297	XrPt398571	XrPt505888	XrPt508650
	XrPt400431		XrPt506987	XrPt402005	XrPt506466	XrPt399304	XrPt507147
	XrPt507326		XrPt505525	XrPt389621	XrPt402508	XrPt505698	XrPt401639
	XrPt506274		XrPt505298	XrPt508522	XrPt399263	XrPt509263	XrPt509027
	XrPt389693		XrPt399541	XrPt399301	XrPt507527	XrPt389931	XrPt346808
	XrPt506512		XrPt400227	XrPt505949	XrPt401104	XrPt402334	XrPt410790
	XrPt410881		XrPt411409	XrPt508379	XrPt390498	XrPt507791	XrPt348429
	XrPt401898		XrPt398766	XrPt411264	XrPt506227	XrPt508161	XrPt401114
	XrPt402114		XrPt509343	XrPt508436	XrPt115453	XrPt399410	XrPt507486
	XrPt507607		XrPt506554	XrPt506539	XrPt344179	Xpr181L900	XrPt400879
	XrPt410859		XrPt399281	XrPt505393	XrPt389324	XrPt509579	XrPt400392
	XrPt344894		XrPt506404	XrPt505692	XrPt400366	XrPt509242	XrPt390655
	XrPt389973		XrPt506681	XrPt390381	XrPt399916	XrPt398472	XrPt346073
	XrPt505351		XrPt390501	XrPt402041	XrPt505915	XrPt506831	XrPt401736
	XrPt345840		XrPt399427	XrPt402337	XrPt402459	XrPt390517	XrPt509477
	XrPt399745		XrPt509500	XrPt410804	XrPt508207	XrPt505989	XrPt506334
	XrPt390428		XrPt509019	XrPt508562	XrPt508779	XrPt400370	XrPt506668
	XrPt400253		XrPt507061	XrPt508059	XrPt399935	XrPt506839	XrPt506836
	XrPt505745		XrPt509402	XrPt508574	XrPt402205	Xpr143L1600	XrPt400312
	XrPt401420		XrPt389594	XrPt508462	XrPt398629	XrPt399680	XrPt390007
	XrPt400126		XrPt401931	XrPt509645	XrPt411236	XrPt400514	XrPt390647
	XrPt509455		XrPt400768	XrPt399716	XrPt402089	Xpr36L750	XrPt410892
	XrPt506992		XrPt505197	XrPt509513	XrPt509319	XrPt505459	XrPt399827
	XrPt389306		XrPt508362	XrPt390228	XrPt401911	XrPt348510	XrPt505356
	XrPt119621		XrPt507933	XrPt506236	XrPt411220	XrPt410850	XrPt507222
	XrPt402575		XrPt389735	XrPt506570	XrPt506637	XrPt344263	XrPt508620
	XrPt389738		XrPt401885	XrPt399991	XrPt399917	XrPt506969	XrPt508525
	XrPt389714		XrPt506374	XrPt400060	XrPt411266	XrPt508596	XrPt507385
	XrPt411112		XrPt505883	XrPt505959	XrPt505829	XrPt400054	XrPt390063
	XrPt401977		XrPt505482	XrPt508690	XrPt399945	XrPt507115	XrPt508352
	XrPt508400		XrPt401488	XrPt401867	XrPt401941	XrPt507840	XrPt507836
	XrPt390563		XrPt399710	XrPt399245	XrPt401505	XrPt401239	XrPt509643
	XrPt410869		XrPt506742	XrPt390337	XrPt390656	XrPt506614	XrPt398733
	XrPt390442		XrPt401227	XrPt509484	XrPt399931	XrPt347758	XrPt507470
	XrPt346779		XrPt509335	Xapr6.23	XrPt400994	XrPt401088	XrPt508824
	XrPt347114		XrPt505433	XrPt509154	XrPt389592	XrPt506126	XrPt398507
	XrPt398845		XrPt505248	XrPt400935	XrPt390670	XrPt390768	XrPt506415
	XrPt402133		XrPt411126	XrPt401529	XrPt507187	XrPt399312	XrPt505895
	XrPt411507		XrPt402020	XrPt411510	XrPt507659	XrPt400425	XrPt508108
	XrPt401648		XrPt399489	XrPt508548	XrPt399803	XrPt506093	XrPt390690
	XrPt401969		XrPt115622	XrPt399452	XrPt505261	XrPt398681	XrPt400485
	XrPt507720		XrPt401470	XrPt508371	XrPt506869	XrPt400483	XrPt345374
	XrPt401932		XrPt507728	XrPt507573	XrPt389917	XrPt390094	XrPt347562
	XrPt399340		XrPt346726		XrPt389617	XrPt507299	XrPt506193
	XrPt347661		XrPt509538		XrPt506212	XrPt505935	XrPt347925
	XrPt347340		XrPt508843		XrPt402552	XrPt399985	XrPt389810
	XrPt402229		XrPt400840		XrPt402475		XrPt401125
	XrPt505897		XrPt389656		XrPt509171		XrPt401549
	XrPt116344		XrPt346177		XrPt506039		XrPt347711
	XrPt508125		XrPt509390		XrPt506500		XrPt63687
	XrPt116320		XrPt402038		XrPt389722		XrPt390525
	XrPt389530		XrPt400557		XrPt505984		XrPt389264
	XrPt508711		XrPt398556		XrPt509045		XrPt509655
	XrPt389665		XrPt389705		XrPt390317		Xscsz1194L750
	XrPt401893		XrPt507626		XrPt505505		XrPt410896
	XrPt343885		XrPt507181		XrPt505921		XrPt399475
	XrPt509093		XrPt402018		XrPt505364		XrPt507266
	XrPt400998		XrPt343814		XrPt398626		XrPt400432
	XrPt401725		XrPt401527		XrPt390566		XrPt398526
	XrPt507940		XrPt401259		XrPt402107		XrPt389946
	XrPt390227		XrPt400682		XrPt389402		XrPt399888
	XrPt506066		XrPt400730		XrPt390286		XrPt400331
	XrPt402654		XrPt399777		XrPt401711		XrPt401195
	XrPt347082		XrPt399635		XrPt505951		XrPt390712
	XrPt509209				XrPt505812		XrPt508818
	XrPt505912				Xapr6.6		XrPt506575
	XrPt399653				XrPt411514		XrPt398555
	XrPt508399						XrPt411354
	XrPt506338						XrPt506473
	XrPt411293						XrPt399597
	XrPt400084						XrPt402480
	XrPt507402						XrPt508374
	XrPt389699						XrPt402276
	XrPt505345						XrPt507838
	XrPt400154						XrPt401486
	XrPt508504						XrPt506178
	XrPt505292						XrPt372435
	XrPt506014						XrPt505383
	XrPt506069						XrPt506435
	XrPt398480						XrPt508968
	XrPt399922						XrPt411373
	XrPt401306						XrPt400077
	XrPt389307						XrPt509395
	XrPt505711						XrPt508388
	XrPt400777						XrPt505986
	XrPt508054						XrPt390603
	XrPt399561						XrPt509721
	XrPt390262						XrPt507643
	XrPt390711						XrPt390469
	XrPt402487						XrPt507502
	XrPt410796						XrPt506219
	XrPt505332						XrPt402526
	XrPt505184						XrPt401467
	XrPt401061
	XrPt66674
	XrPt410839
	XrPt505396
	XrPt410862
	XrPt506184
	XrPt389998
	XrPt505695
	XrPt389399
	XrPt400218
	XrPt400220
	XrPt400389
	XrPt410789
	XrPt402348
	XrPt507305
	XrPt346832
	XrPt346701
	XrPt509216
	XrPt389282
	XrPt400912
	XrPt348380
	XrPt506786
	XrPt411144
	XrPt508835
	XrPt389519
	XrPt509183
	XrPt505673
	XrPt411509
	XrPt508549
	XrPt400459
	XrPt505709
	XrPt348747
	XrPt349205
	XrPt402208
	XrPt347307
	XrPt389853
	XrPt506171
	XrPt410952
	XrPt507032
	XrPt121523
	XrPt399755
	XrPt509735
	XrPt505212
	XrPt411401
	XrPt389305
	XrPt400555
	XrPt401579
	XrPt509330
	XrPt399399
	XrPt389311
	XrPt411086
	XrPt400921
	XrPt410898
	XrPt506476
	XrPt507025
	XrPt506549
	XrPt389375
	XrPt400157
	XrPt401083
	XrPt506980
	XrPt347845
	XrPt508477
	XrPt506513
	XrPt402030
	XrPt411128
	XrPt399540
	Xscm078
	XrPt505252
	XrPt507463
	Xscm046
	XrPt389765
	XrPt507002
	XrPt506201
	XrPt506755
	XrPt508919
	XrPt509333
	XrPt506099
	XrPt507589
	XrPt399879
	XrPt506263
	XrPt508321
	XrPt411161
	XrPt401881
	XrPt346573
	XrPt400819
	XrPt400005
	XrPt506799
	XrPt506868
	XrPt411511
	XrPt505444
	XrPt509351
	XrPt401054
	XrPt399825
	XrPt402383
	Xpsr454L1000
	XrPt508076
	XrPt401099
	XrPt505662
	XrPt344347
	XrPt509095
	XrPt121400
	XrPt401449
	XrPt509284
	XrPt507683
	XrPt507673
	XrPt506495
	XrPt506000
	XrPt389538
	XrPt506194
	XrPt505789
	XrPt400919
	XrPt509447
	XrPt411364
	XrPt346894
	XrPt398540
	XrPt411416
	XrPt398616
	XrPt390089
	XrPt400358
	XrPt400211
	XrPt398593
	XrPt400158
	XrPt509724
	XrPt402096
	XrPt505559
	XrPt402659
	XrPt400918
	XrPt507881
	XrPt400203
	XrPt402242
	XrPt400179
	XrPt401152
	XrPt509080
	XrPt401651
	XrPt401404
	XrPt401674
	XrPt400209
	XrPt411030
	XrPt399633
	XrPt400273
	XrPt506626
	XrPt399377
	XrPt401201
	XrPt507704
	XrPt399763
	XrPt507169
	XrPt389825
	XrPt398543
	XrPt400841
	XrPt400044
	XrPt402015
	XrPt402447
	XrPt507674
	XrPt399406
	XrPt399691
	XrPt509143
	XrPt507745
	XrPt507631
	XrPt389350
	XrPt400702
	XrPt372662
	XrPt400168
	XrPt399933
	Xpsr148
	XrPt508981
	XrPt508092
	XrPt401056
	XrPt400608
	XrPt509617
	XrPt399421
	XrPt506808
	XrPt507592
	XrPt401346
	XrPt507821
	XrPt347005
	XrPt505885
	XrPt66560
	XrPt347391
	XrPt505654
	XrPt348234
	XrPt401314
	XrPt509063
	XrPt509167
	XrPt509271
	XrPt507715
	XrPt507397
	XrPt390636
	XrPt116979
	XrPt505250
	XrPt505267
	XrPt400800
	XrPt399416
	XrPt505447
	XrPt507320
	XrPt410904
	XrPt390153
	XrPt401636
	XrPt410775
	XrPt402522
	XrPt505870
	XrPt116930
	XrPt400694
	XrPt398738
	XrPt347048
	XrPt399587
